# Supplementary material for: Anti-silencing factor Epe1 associates with SAGA to regulate transcription within heterochromatin
Source: PubMed Central journal article supplement — Genes Dev. 2019 Jan 1;33(1-2):116–26. doi: 10.1101/gad.318030.118 (PMC6317313; doi:10.1101/gad.318030.118), 2019-01-01
Supplement: supp_gad.318030.118_Supplemental_Figures_.pdf [file supp_gad.318030.118_Supplemental_Figures_.pdf]

|     | Gene deletion  | Rescue score   |
|-----|----------------|----------------|
| HAT | <i>gcn5</i> Δ  | 2              |
|     | <i>ada2</i> Δ  | 0              |
|     | <i>ada3</i> Δ  | 2              |
|     | <i>sgf29</i> Δ | 0              |
|     | <i>tra1</i> Δ  | 2              |
| DUB | <i>ubp8</i> Δ  | 0              |
|     | <i>sgf73</i> Δ | 0              |
|     | <i>sgf11</i> Δ | 0              |
|     | <i>sus1</i> Δ  | Not in Library |
|     | <i>ada1</i> Δ  | Not in Library |
| SPT | <i>spt8</i> Δ  | 0              |
|     | <i>spt3</i> Δ  | 0              |
|     | <i>spt7</i> Δ  | Not in Library |
|     | <i>spt20</i> Δ | Not in Library |
|     | <i>taf5</i> Δ  | Essential Gene |
| TAF | <i>taf6</i> Δ  | Essential Gene |
|     | <i>taf9</i> Δ  | Essential Gene |
|     | <i>taf10</i> Δ | Essential Gene |
|     | <i>taf12</i> Δ | Essential Gene |

Supplementary Figure 1. Summary of SAGA subunits as suppressors of Epe1 overexpression from the screen with deletion library. Colony size were assigned scores between 0 and 3, with 0 indicates no growth and 3 indicates full growth.

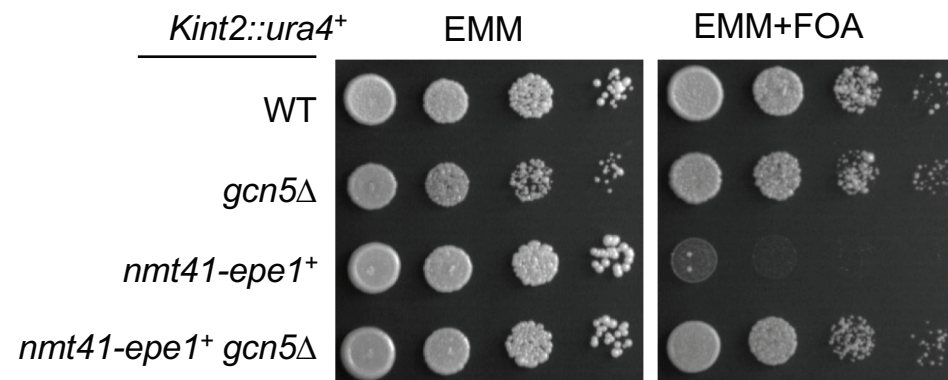

Supplementary Figure 2. *gcn5* $\Delta$  also rescues silencing defects at the mating-type region caused by Epe1 overexpression. Ten-fold serial dilution analyses of indicated yeast strains were grown on indicated media to measure the expression of the *Kint2::ura4<sup>+</sup>* reporter gene.

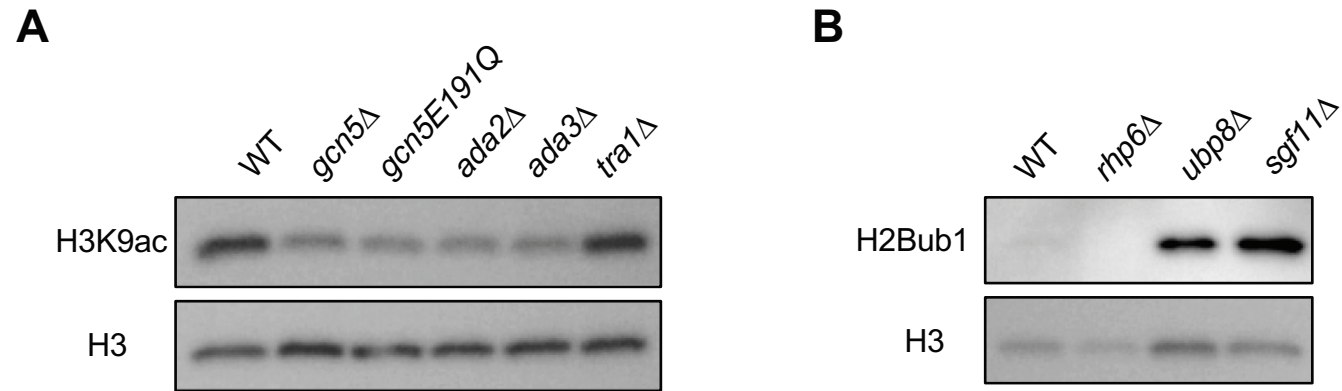

Supplementary Figure 3. Western blot analyses of H3K9ac (A) and H2Bub1 (B) levels of indicated yeast strains. H3 serves as a loading control.

**A**

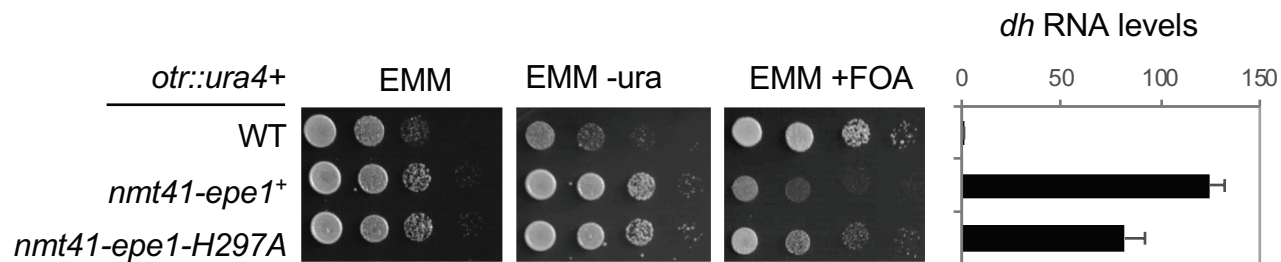

**B**

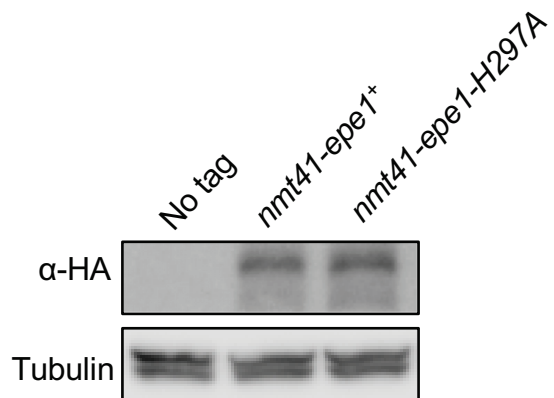

**C**

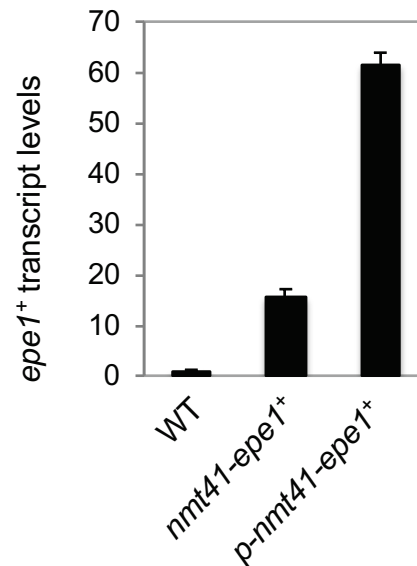

Supplementary Figure 4. Analysis of the Epe1-H297A mutant. (A) Left, ten-fold serial dilution analyses of indicated yeast strains were grown on indicated media to measure the expression of the *otr::ura4<sup>+</sup>* reporter gene. Right, qRT-PCR analysis of *dh* transcript levels, normalized to *act1<sup>+</sup>*. (B) Western blot analyses to measure the levels of HA tagged Epe1 and Tubulin in indicated yeast strains. (C) qRT-PCR analysis of *epe1<sup>+</sup>* transcript levels, normalized to *act1<sup>+</sup>*.

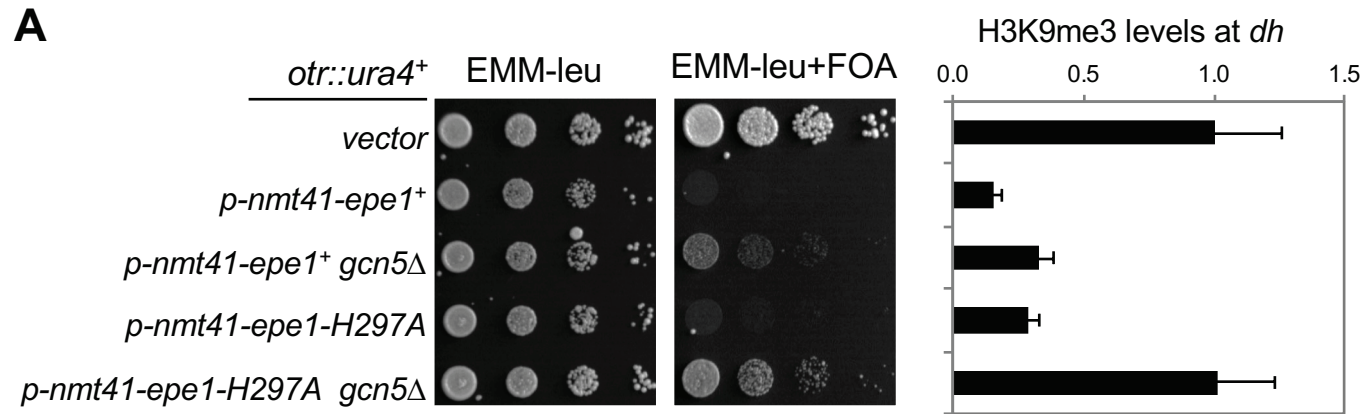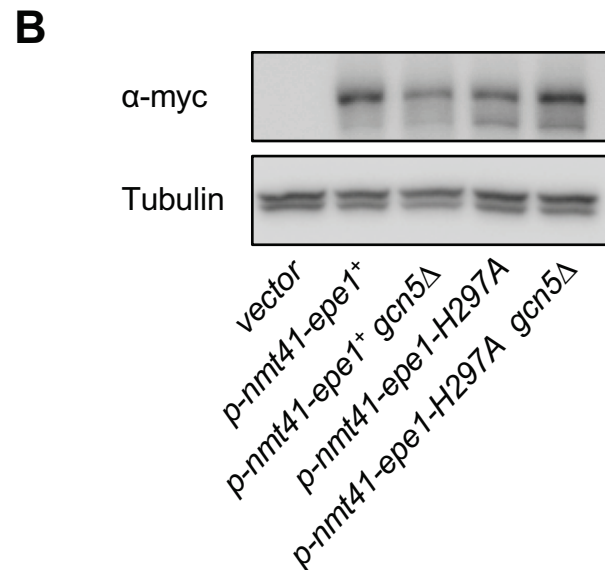

Supplementary Figure 5. *gcn5Δ* rescues silencing defects associated with overexpression of wild type Epe1 or an Epe1 demethylase mutant. Epe1 and Epe1-H297A are overexpressed from plasmids and under the control of the *nmt41* promoter. (A) Left, ten-fold serial dilution analyses of indicated yeast strains were grown on indicated media to measure the expression of the *otr::ura4<sup>+</sup>* reporter gene. Right, ChIP analyses of H3K9me3 levels at *dh*, normalized to *act1<sup>+</sup>*. (B) Western blot analyses to measure the levels of myc-tagged Epe1 and Tubulin in indicated yeast strains.

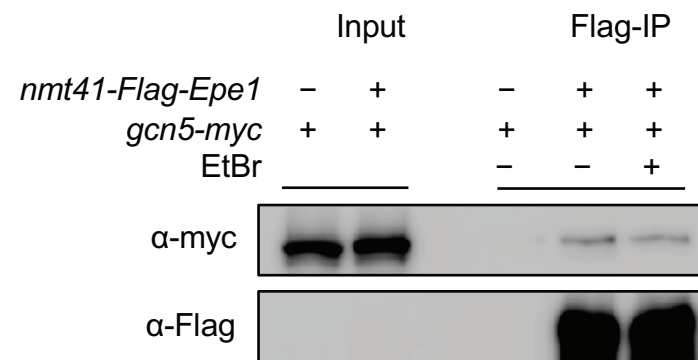

Supplementary Figure 6. The interaction between Epe1 and Gcn5 is not bridged by DNA. Co-immunoprecipitation analyses of Epe1 and Gcn5 either with or without treatment of the lysate with Ethidium Bromide (EtBr) to disrupt protein-DNA interactions.

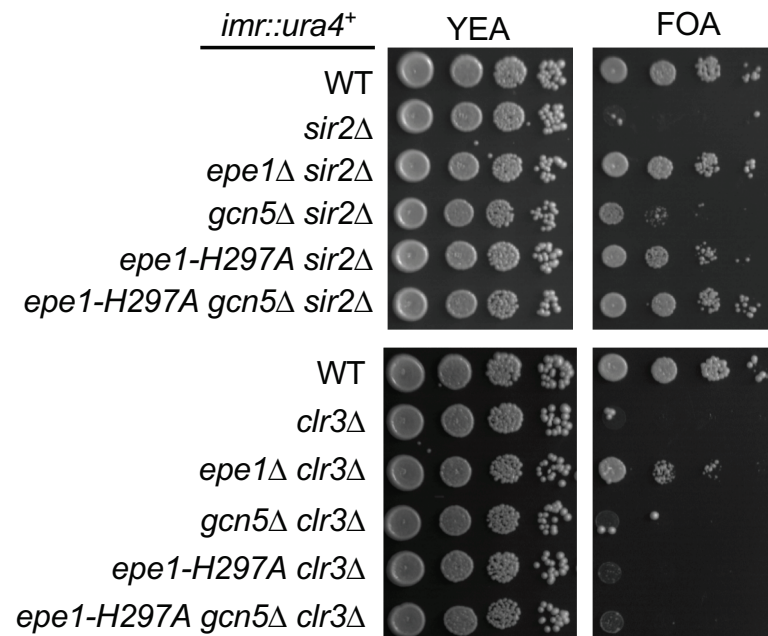

Supplementary Figure 7. Ten-fold serial dilution analyses of indicated yeast strains were grown on indicated media to measure the expression of the *imr::ura4<sup>+</sup>* reporter gene.

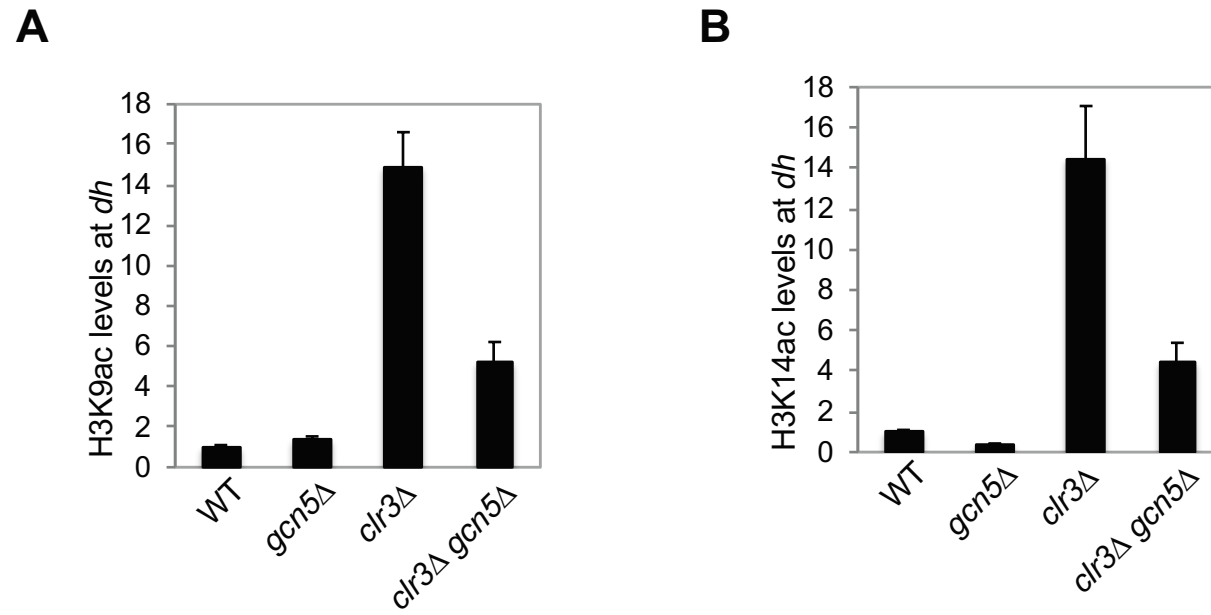

Supplementary Figure 8. ChIP analyses of H3K9ac and H3K14ac levels at pericentric *dh* repeat shown as ChIP/Input, normalized to WT.



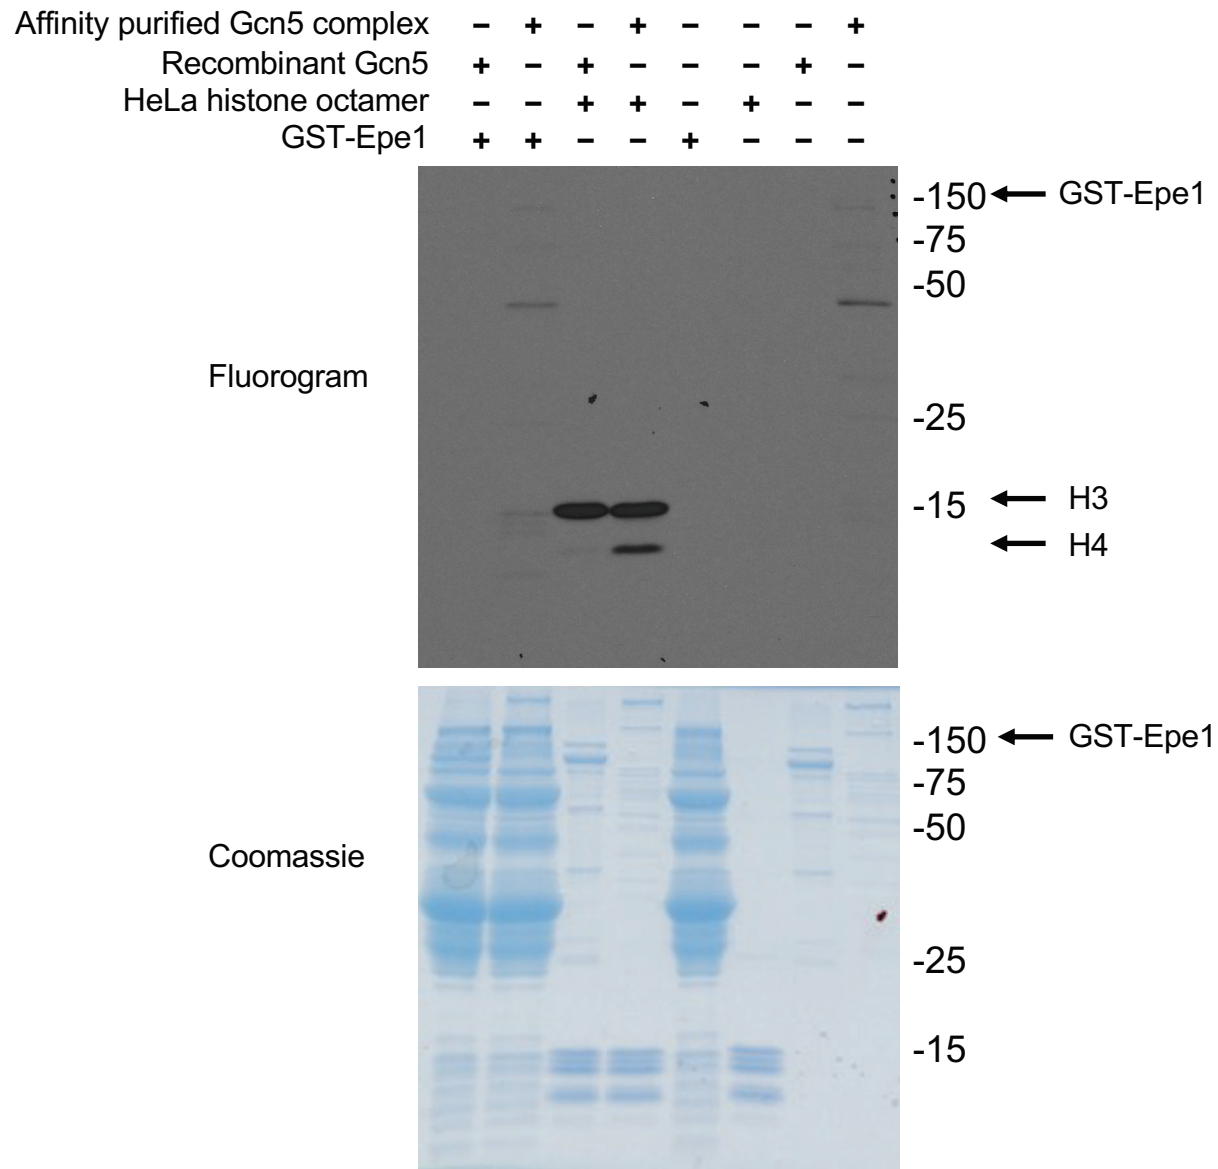

Supplementary Figure 9. In vitro histone acetyltransferase assay using purified Gcn5 complex or recombinant Gcn5, with either recombinant GST-Epe1 or HeLa histones as substrates. Top, Fluorogram to measure the incorporation of  $^3\text{H}$  labelled acetyl-CoA. Bottom, Coomassie stain to show proteins.

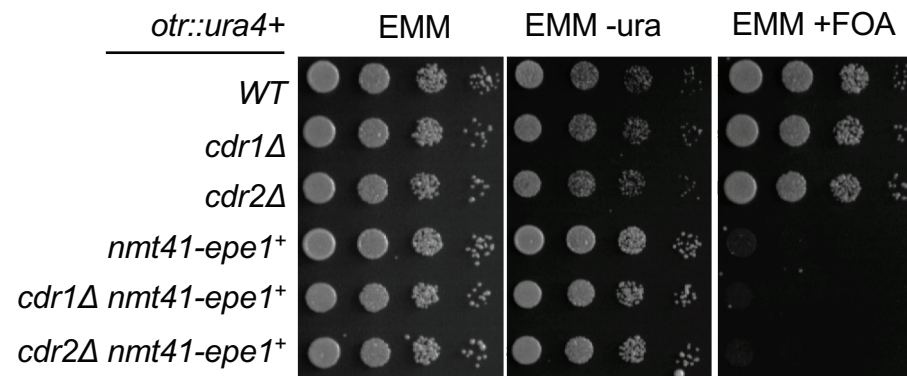

Supplementary Figure 10. Ten-fold serial dilution analyses of indicated yeast strains were grown on indicated media to measure the expression of the *otr::ura4+* reporter gene.

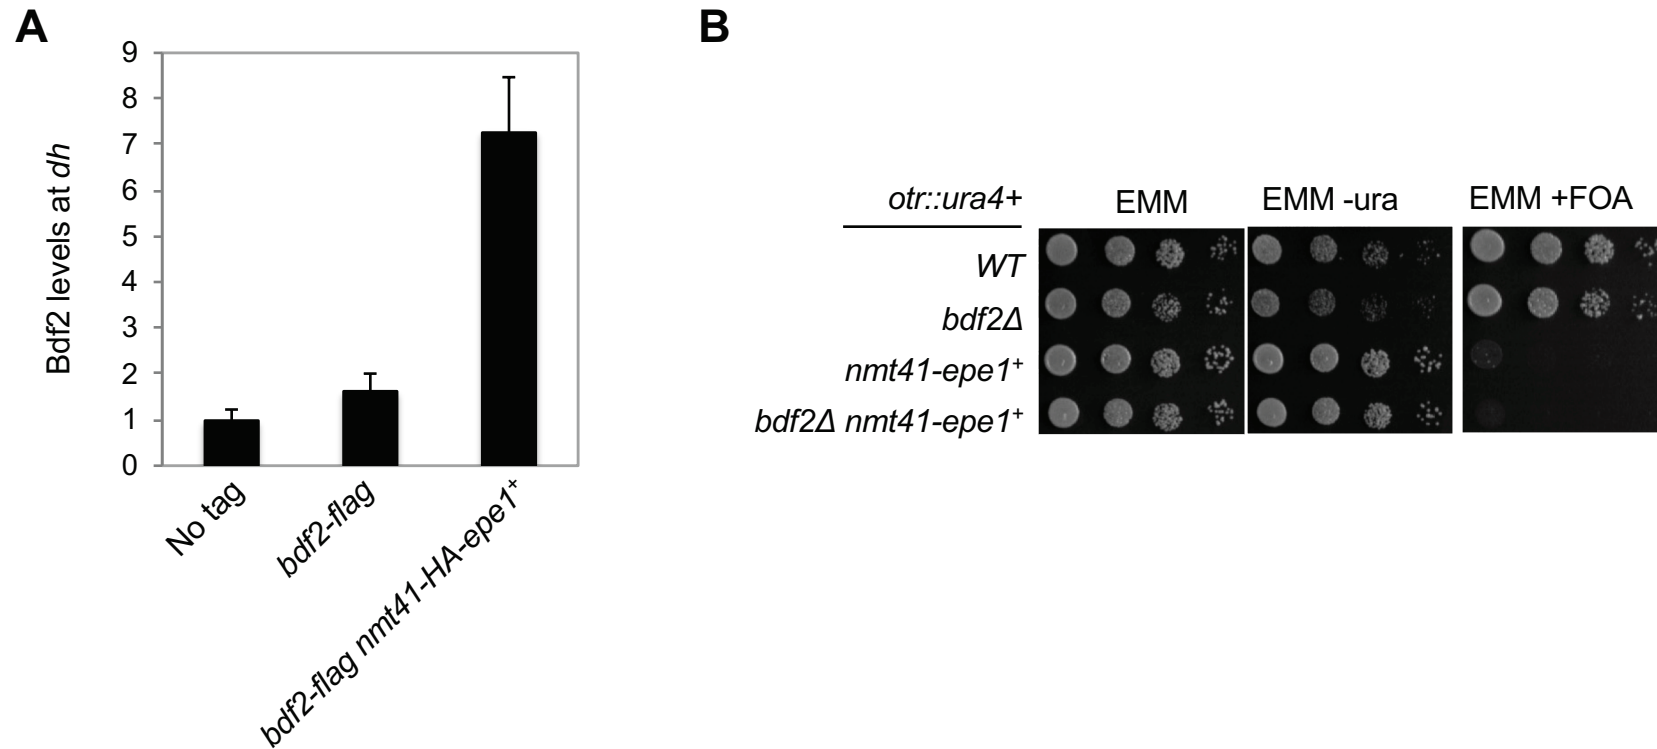

Supplementary Figure 11. Bdf2 and the effects of Epe1 overexpression on heterochromatin. (A) ChIP analyses of Bdf2 levels at pericentric *dh* repeats, normalized to *act1*<sup>+</sup>. (B) Ten-fold serial dilution analyses of indicated yeast strains were grown on indicated media to measure the expression of the *otr::ura4*<sup>+</sup> reporter gene.
